# Supplementary material for: Effect of Vibration Acceleration on Interface Microstructure and Bonding Strength of Mg–Al Bimetal Produced by Compound Casting
Source: MDPI journal article supplement (doi:10.3390/met12050766), 2022-04-29
Supplement: s1 [file s1]

Archive with 1 entries (1 files):
- metals-1666406 Supplementary.pdf
